# Supplementary material for: Molecular Epidemiology of Genital Infections in Campania Region: A Retrospective Study
Source: MDPI journal article supplement (doi:10.3390/diagnostics12081798), 2022-07-25
Supplement: s1 [file s1]

**Table S1.** Distribution of genital infections between age study group.

| Age (years) | Number | GIs Positive (%) | Single Infection (%) | Double Infection (%) | Triple Infection (%) | Quadruple Infection (%) |
|-------------|--------|------------------|----------------------|----------------------|----------------------|-------------------------|
| <30         | 68     | 19 (27.94%)      | 14 (20.59%)          | 4 (5.88%)            | 1 (1.47%)            | 0                       |
| 30-39       | 362    | 174 (48.06%)     | 116 (32.04%)         | 52 (14.36%)          | 5 (1.38%)            | 1 (0.27%)               |
| 40-49       | 232    | 94 (40.52%)      | 65 (28.02%)          | 26 (11.20%)          | 2 (0.86%)            | 1 (0.43%)               |
| ≥50         | 55     | 15 (27.27%)      | 12 (21.81%)          | 2 (3.64%)            | 0                    | 1 (1.82%)               |
| Total       | 717    | 302              | 207                  | 84                   | 8                    | 3                       |
